# Supplementary material
Source: PubMed Central journal article supplement (PMC2393759)

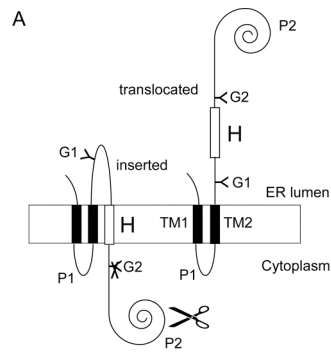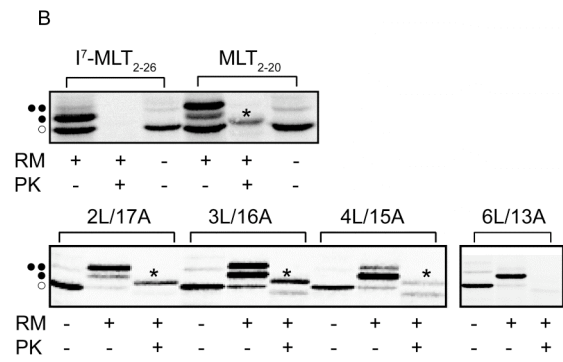

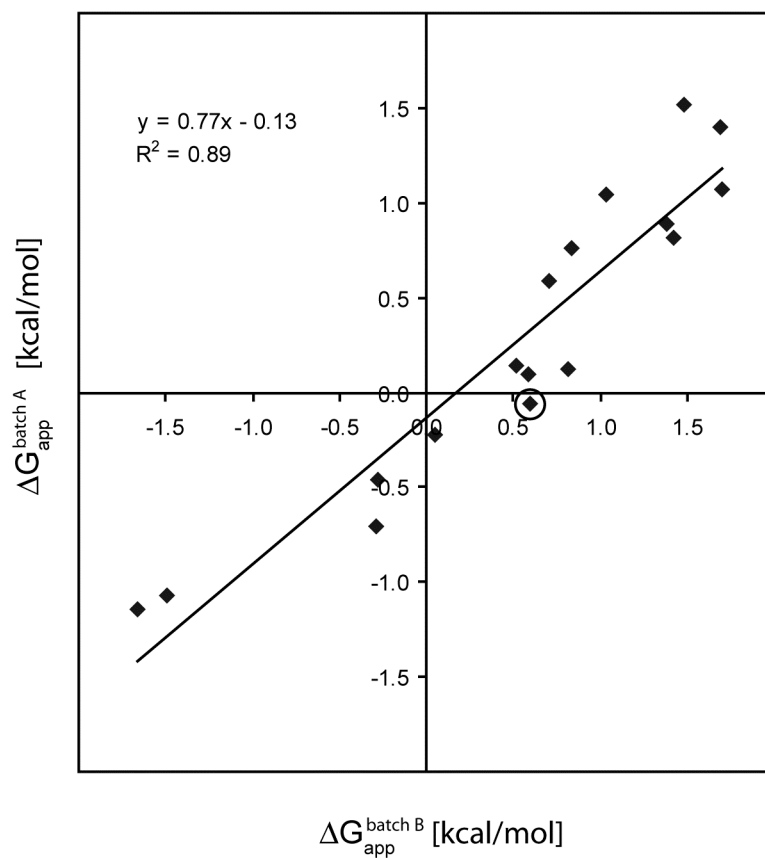

Supplement: pnas_0711580105_1.pdf [file pnas_0711580105_1.pdf]



Supplement: pnas_0711580105_2.pdf [file pnas_0711580105_2.pdf]
